# Supplementary material for: Combination genetic signature stratifies lower-grade gliomas better than histological grade
Source: PubMed Central journal article supplement (PMC4673237; doi:10.18632/oncotarget.4928), 2015-08-11
Supplement: oncotarget-06-20885-s001.pdf [file oncotarget-06-20885-s001.pdf]

SUPPLEMENTARY FIGURE AND TABLES

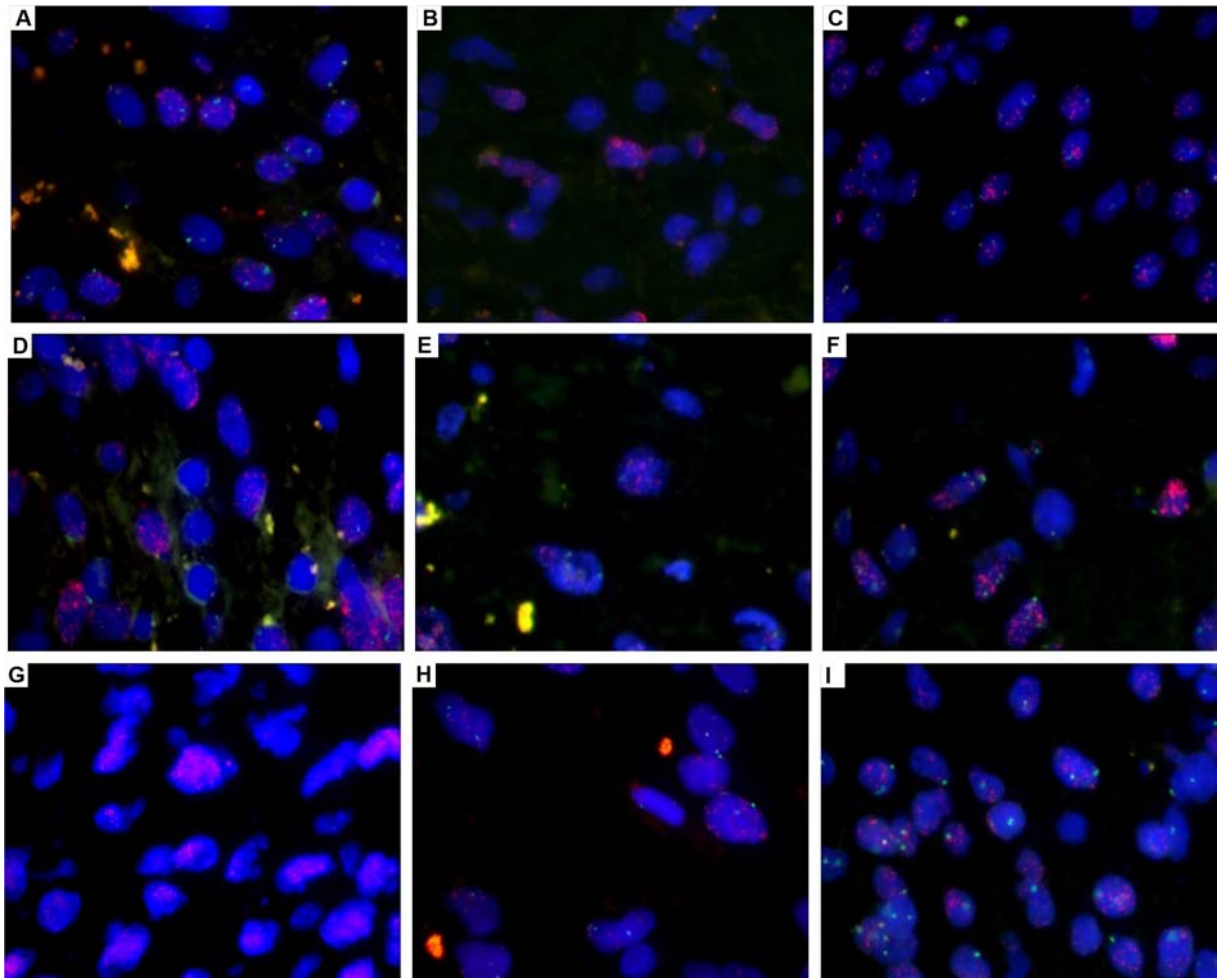

Supplementary Figure S1: Representative fluorescence *in-situ* hybridization micrograph showing clusters of tumor cells with *EGFR* gene amplification (red) in diffuse astrocytomas A to F, and anaplastic astrocytomas G to I.

**Supplementary Table S1: Clinical data of nine patients with *EGFR* amplified lower-grade gliomas**

| Age/sex | Diagnosis | Tumor location                                   | Pre-operative radiological finding                                                                                         | Operation | Radiotherapy | Chemotherapy | Status | OS (years) |
|---------|-----------|--------------------------------------------------|----------------------------------------------------------------------------------------------------------------------------|-----------|--------------|--------------|--------|------------|
| 46 / F  | AII       | left frontal                                     | Contrast CT - Hypodense non-enhancing lesion in left frontal parasagittal region                                           | Bx        | Yes          | Yes          | Dead   | 1.4        |
| 57 / F  | AII       | right frontal                                    | Plain CT - Subtle hypodense lesion over right frontal parafalcine region with diminished grey-white matter differentiation | Bx        | Yes          | No           | Dead   | 1.3        |
| 51 / F  | AII       | corpus callosum                                  | N/A                                                                                                                        | N/A       | N/A          | N/A          | Dead   | 0.7        |
| 64 / M  | AII       | right parietal, corpus callosum, periventricular | N/A                                                                                                                        | PR        | Yes          | No           | Dead   | 0.6        |
| 48 / M  | AII       | left thalamus, basal ganglion, midbrain          | N/A                                                                                                                        | Bx        | No           | No           | Dead   | 0.2        |
| 46 / F  | AII       | left parietal                                    | N/A                                                                                                                        | Bx        | Yes          | No           | Dead   | 3.9        |
| 48 / F  | AAIII     | intraventricular                                 | Contrast CT - intraventricular heterogeneous tumor                                                                         | Bx        | No           | No           | Dead   | 0.01       |
| 54 / F  | AAIII     | right frontal                                    | MRI - T2 diffuse signal in right frontal region with gyral increase hyperintensity, no contrast enhancement                | Bx        | Yes          | No           | Dead   | 1.1        |
| 47 / F  | AAIII     | left temporal                                    | N/A                                                                                                                        | GTR       | Yes          | Yes          | Dead   | 1.8        |

GTR, gross total resection; PR, partial resection; Bx, biopsy; OS, overall survival; N/A, data not available

**Supplementary Table S2: Primers used in PCR of *IDH1*, *IDH2* and *TERT*<sub>p</sub>**

|                          | Sense                | Antisense            | Product size |
|--------------------------|----------------------|----------------------|--------------|
| <i>IDH1</i>              | CGGTCTTCAGAGAAGCCATT | CACATTATTGCCAACATGAC | 122 bp       |
| <i>IDH2</i>              | AGCCCATCATCTGCAAAAAC | CTAGGCGAGGAGCTCCAGT  | 150 bp       |
| <i>TERT</i> <sub>p</sub> | GTCCTGCCCTTCACCTT    | CAGCGCTGCCTGAAACTC   | 163 bp       |
